# Supplementary material for: Distinct mechanisms orchestrate the contra-polarity of IRK and KOIN, two LRR-receptor-kinases controlling root cell division
Source: PubMed Central journal article supplement (PMC8752632; doi:10.1038/s41467-021-27913-1), 2022-01-11
Supplement: 41467_2021_27913_MOESM1_ESM.pdf [file 41467_2021_27913_MOESM1_ESM.pdf]

1 **Supplementary information**

2 **Distinct mechanisms orchestrate the contra-polarity of IRK and KOIN, two**  
3 **LRR-receptor-kinases controlling root cell division**

4

5

6 Short Title: IRK and KOIN polarity is established by distinct mechanisms

7

8

9 Cecilia Rodriguez-Furlan, Roya Campos, Jessica N. Toth, and Jaimie M. Van  
10 Norman\*

11

12 Department of Botany and Plant Sciences, Center for Plant Cell Biology, Institute  
13 of Integrative Genome Biology, University of California, Riverside, Riverside, CA  
14 92521, USA.

15

16 \*corresponding and contact author: Jaimie M. Van Norman

17 [jaimie.vannorman@ucr.edu](mailto:jaimie.vannorman@ucr.edu)

18

19 **Supplementary information includes:**

20 Supplementary figures 1-12

21 Supplementary tables 1-3

22

23 **Supplementary figures and legends**

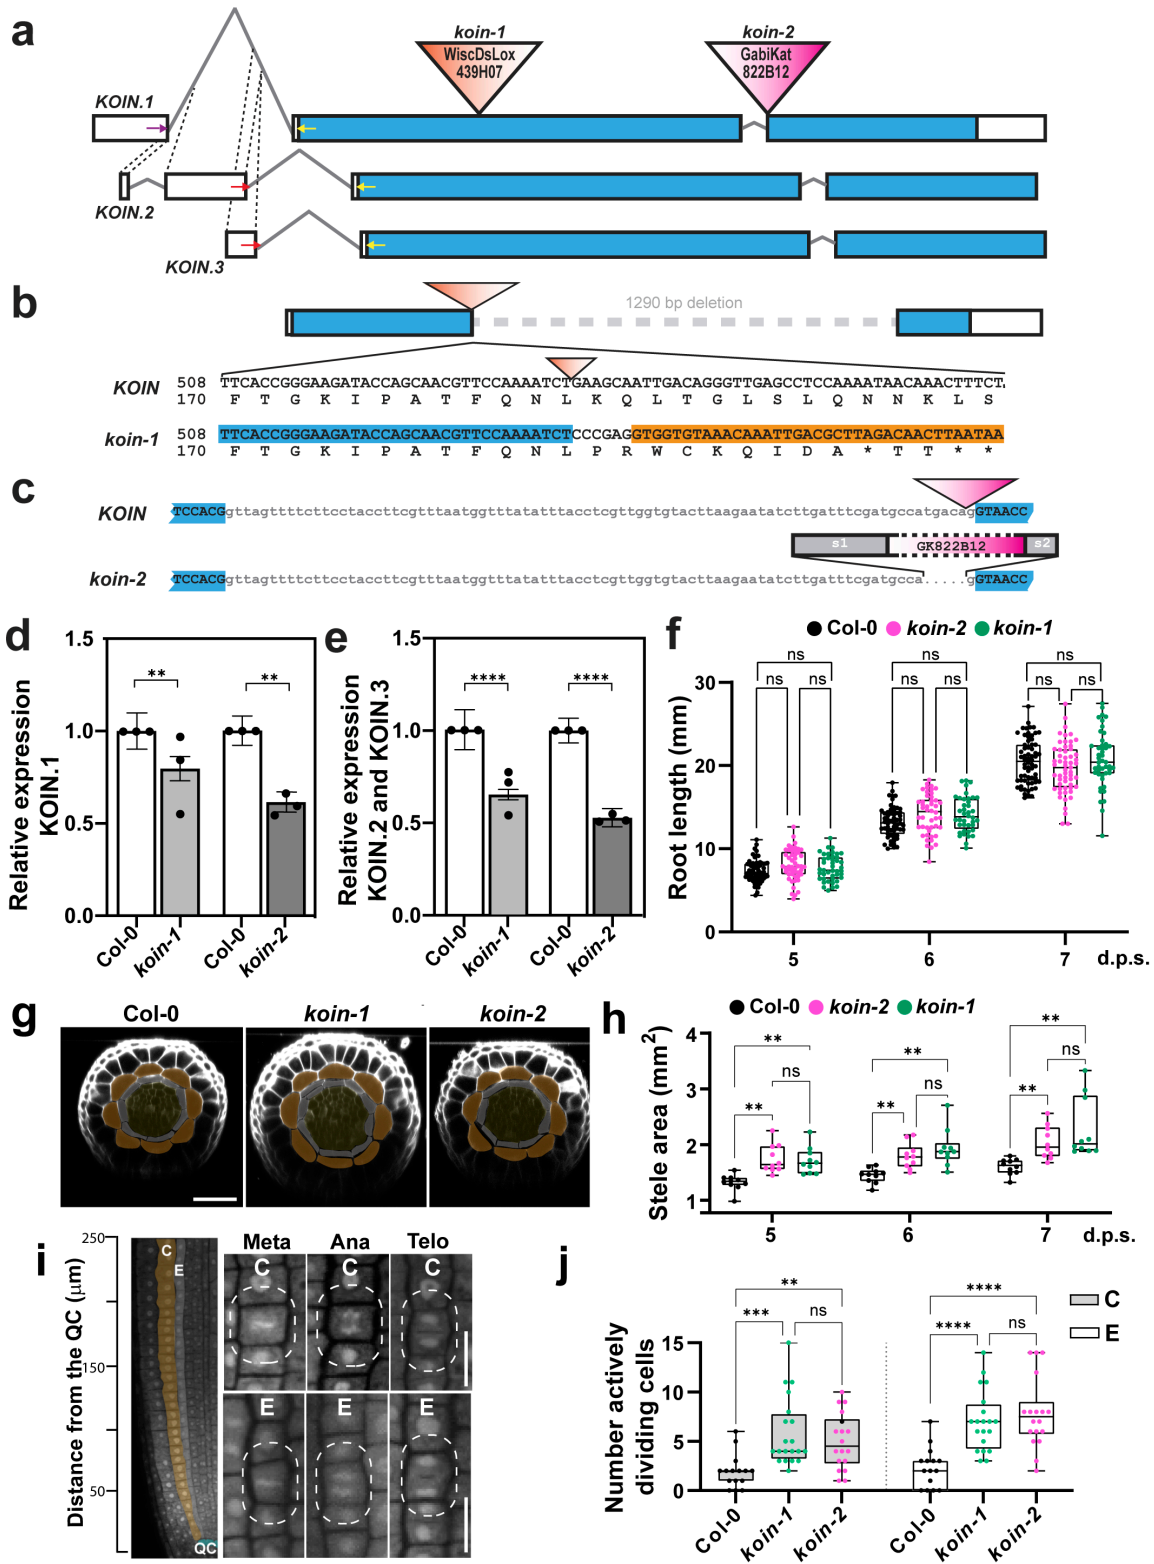

25 **Supplementary Fig. 1. *KOIN* gene structure, mutant alleles, and root**  
26 **phenotypes.** (a) *KOIN* (At5g58300) gene models (at 3/16 scale) with introns (gray  
27 lines), exons/UTRs (white boxes), and the coding region (blue boxes). The *KOIN*  
28 coding region is identical in each splice variant. The T-DNA insertions (not to scale)  
29 with intense color indicating the left border. (b, c) *KOIN* and *koin* genomic regions  
30 with numbers at right indicating base pairs (bp, upper) and amino acids (lower). (b)  
31 The *koin-1* T-DNA insertion (WiscDsLox\_439H07, orange) results in addition of 9  
32 novel amino acids, then premature stop codons (\*). Additionally, there is a 1290 bp  
33 genomic deletion (gray dotted line) downstream of the insertion. (c) The *koin-2* T-  
34 DNA insertion (Gabi-Kat822B12, pink) occurs within the last intron (lower case grey  
35 letters) just before the exon begins (blue, uppercase letters). The T-DNA insertion is  
36 flanked on each side by novel sequence (gray boxes at  $\frac{3}{4}$  scale, s1 (65 bp) and s2  
37 (21 bp)). (d, e) Expression of *KOIN* isoforms in *koin* mutants relative WT and  
38 normalized to the control *PP2A*. Graphs show the average of three independent  
39 biological replicates (RNA extracted from 20 seedlings/genotype/replicate) with bars  
40 indicating SEM and dots showing data from individual replicates (see Source Data  
41 for raw data). Stars indicate statistical significance (\*\* is P value of < 0.01) calculated  
42 by Student's T-test. Arrows in (a) indicate the primer locations (not to scale, see  
43 Table S2). The forward primers (purple and red) span the exon-exon junction and  
44 pair with the same reverse primer (yellow). (f) Root length of WT (Col-0) and *koin*  
45 alleles (40-46 roots/genotype) over time (5-7 d.p.s.). (g) Confocal images of  
46 transverse sections of root meristems with endodermis (gray) and cortex (orange)  
47 highlighted. (h) Quantification of stele area in these genotypes over time 5-7 d.p.s.  
48 with bars indicating min./max. values. Data shown from a single representative  
49 biological replicate (of three) each containing 15-20 roots/genotype. (i) Confocal  
50 image of a WT root fixed at 7 d.p.s. showing the QC (cyan), cortex (orange), and  
51 endodermal (gray) cells at various cell cycle stages: metaphase (meta), anaphase  
52 (ana), and telophase (telo). (j) Quantification of cells in active stages of cell division  
53 in WT, *koin-1*, and *koin-2* (20 roots/genotype) counted from the QC 250  $\mu$ m up. Scale  
54 bars: (g) 25  $\mu$ m, (i) 10  $\mu$ m. Abbreviations: ns= no significant difference. In the box  
55 plots in f, h, and j whiskers indicate variability outside the upper and lower quartiles

56 (max/min values), within the boxes median values are indicated by the line and  
57 single values are represented as dots, and 1-4 stars indicate the statistical  
58 significance ( $P < 0.05$  calculated by two-way ANOVA and Tukey's multiple  
59 comparisons test).



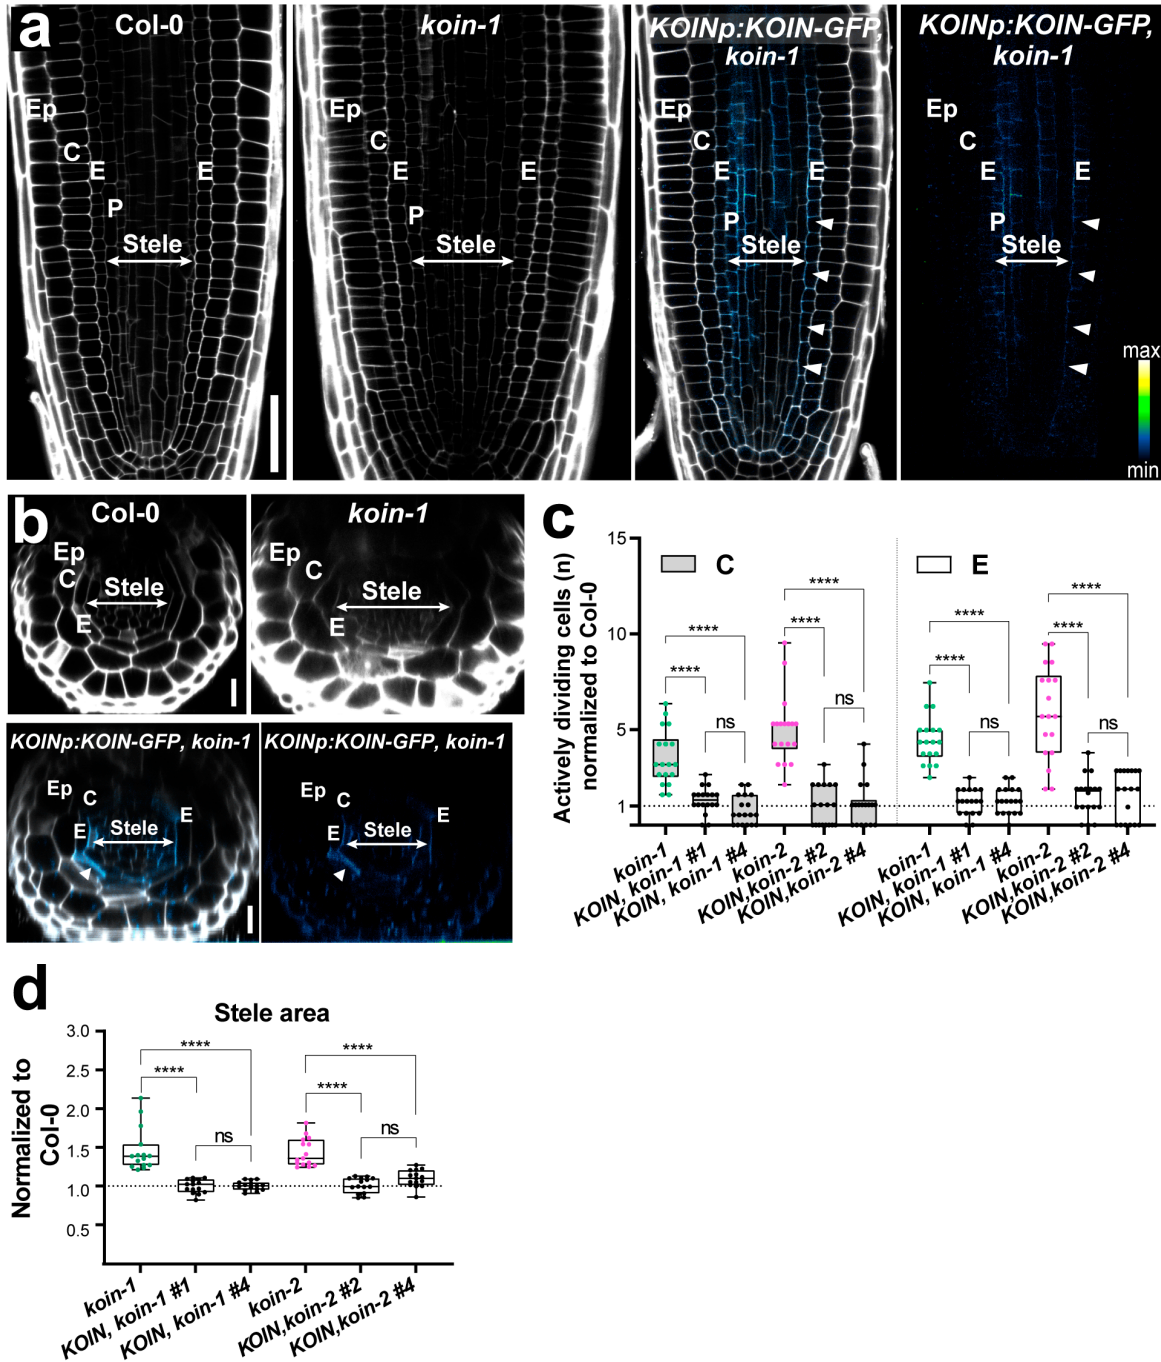

60

61 **Supplementary Fig. 2. *koin* root meristems are larger with increased cell**

62 **division.** Confocal images of the (a) median longitudinal and (b) transverse sections

63 of root meristems expressing *pKOIN:KOIN:GFP #4* at 6 d.p.s. Adjacent panels show

64 merged images of green fluorescent protein (GFP, fluorescence intensity color

65 scale) and PI stain (gray scale) followed by GFP alone.

66 (c) Quantification of endodermal and cortex cells in active stages of cell division and (d) stele area in

67 *koin-1* and *koin-2* and those alleles expressing *pKOIN:KOIN:GFP* with two  
68 independent lines each normalized to Col-0. (c-d) Statistical significance 1-4 stars  
69 the ( $P < 0.05$  calculated by two-way ANOVA and Tukey's multiple comparisons test).  
70 Data from a single biological replicate that is representative (of three) with similar  
71 results (7 d.p.s.  $n = 20/\text{genotype}$ ). The statistical significance 1-4 stars ( $P < 0.05$   
72 calculated by ANOVA and Dunnett's multiple comparisons test). Scale bars: (a) 30  
73  $\mu\text{m}$ , (b) 10  $\mu\text{m}$ .

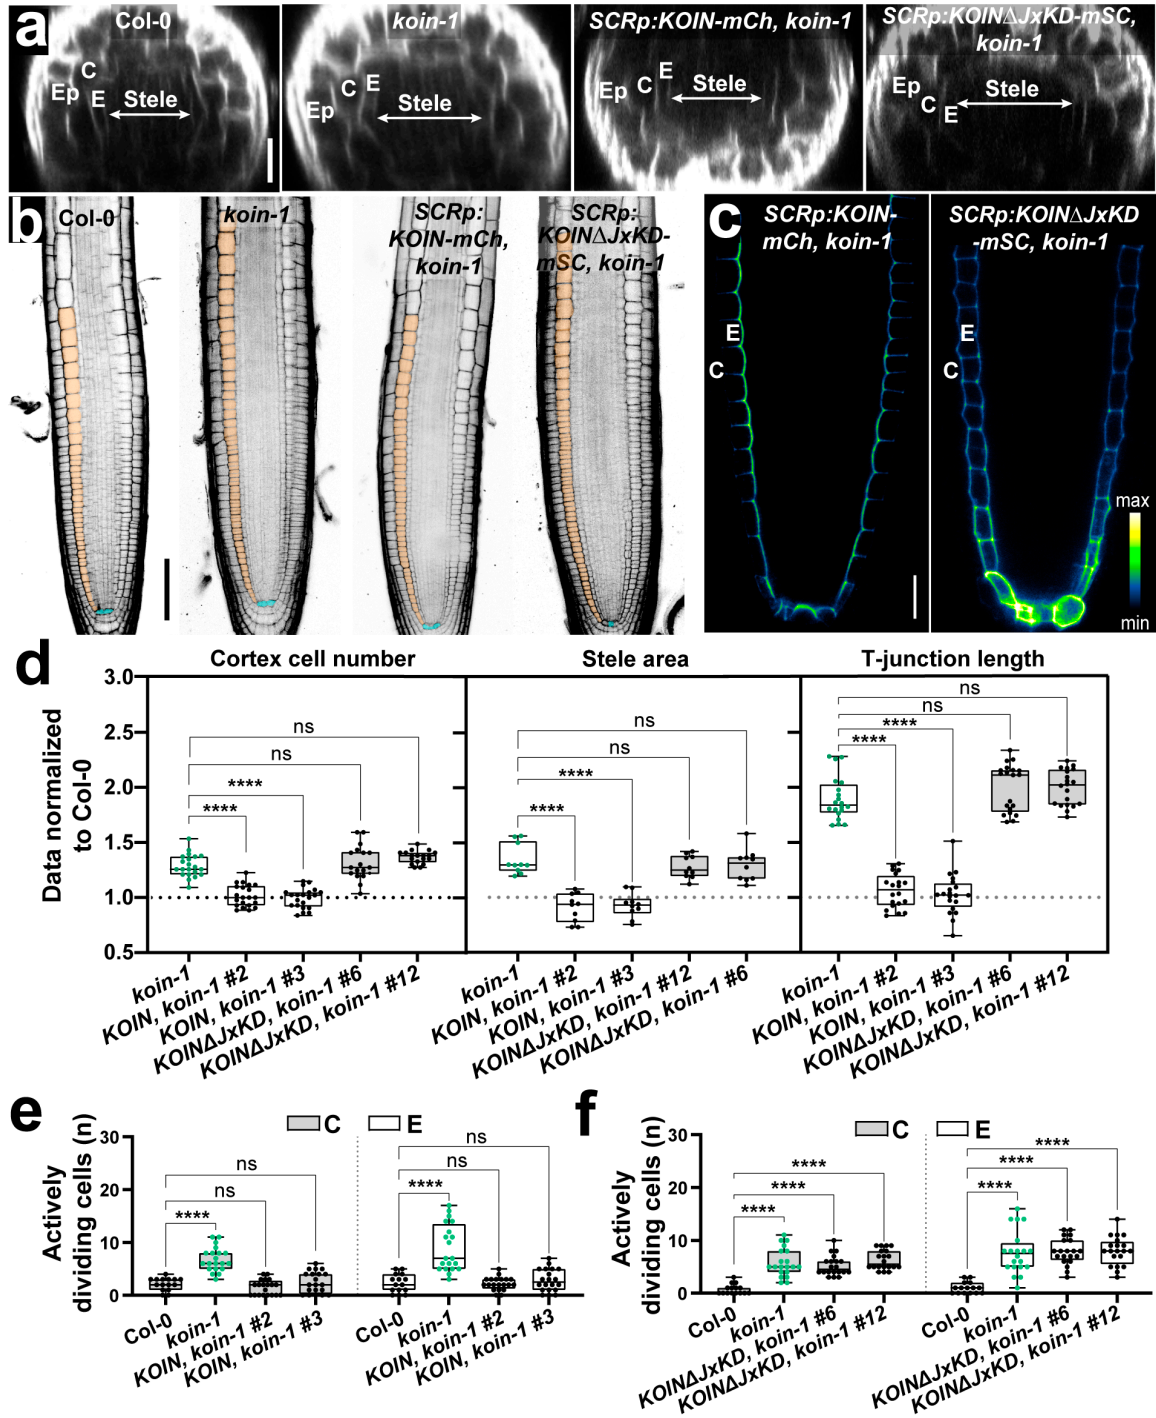

74

75 **Supplementary Fig. 3: Endodermal expressed KOIN is polarized and rescues**  
 76 ***koin-1* mutant phenotypes, whereas KOIN $\Delta$ JxKD is nonpolar and does not**  
 77 **rescue.** (a, b) Confocal images of transverse (a) and median longitudinal (b) optical  
 78 sections from root tips of WT, *koin-1* and *koin-1* expressing SCRp driven KOIN-GFP  
 79 and KOIN $\Delta$ JxKD-GFP. Roots stained with PI (a) gray and (b) B/W with meristematic

80 cortex cells colored in orange and the QC in cyan. (c) Confocal images of median  
81 longitudinal sections from *koin-1* root tips expressing *SCRp* driven KOIN-mCHERRY  
82 (mCH) and KOINΔJxKD-mSCARLET (mSC) with fluorescence shown in intensity  
83 color scale. (d-f) Quantification of various root phenotypes in *koin-1* and *koin-1*  
84 expressing *SCRp*:KOIN-mCH or KOINΔJxKD-mSC (two independent transgenic  
85 lines each) normalized to Col-0. Graphs show representative results of experiments  
86 performed in  $\geq 3$  independent replicates, with  $n = 20$  roots/genotype, bars indicate  
87 max-min values, and \*\*\*\*=  $p < 0.0001$ , ns = not significant (two-way ANOVA and  
88 Dunett's multiple comparisons test). Whiskers indicate max-min values, in the boxes  
89 median values are indicated with a line, and single values are represented as dots  
90 Abbreviations: Ep, epidermis, C, cortex; E, endodermis. Scale bars: (a) 20  $\mu\text{m}$ , (b)  
91 50  $\mu\text{m}$ , and (c) 10  $\mu\text{m}$ .

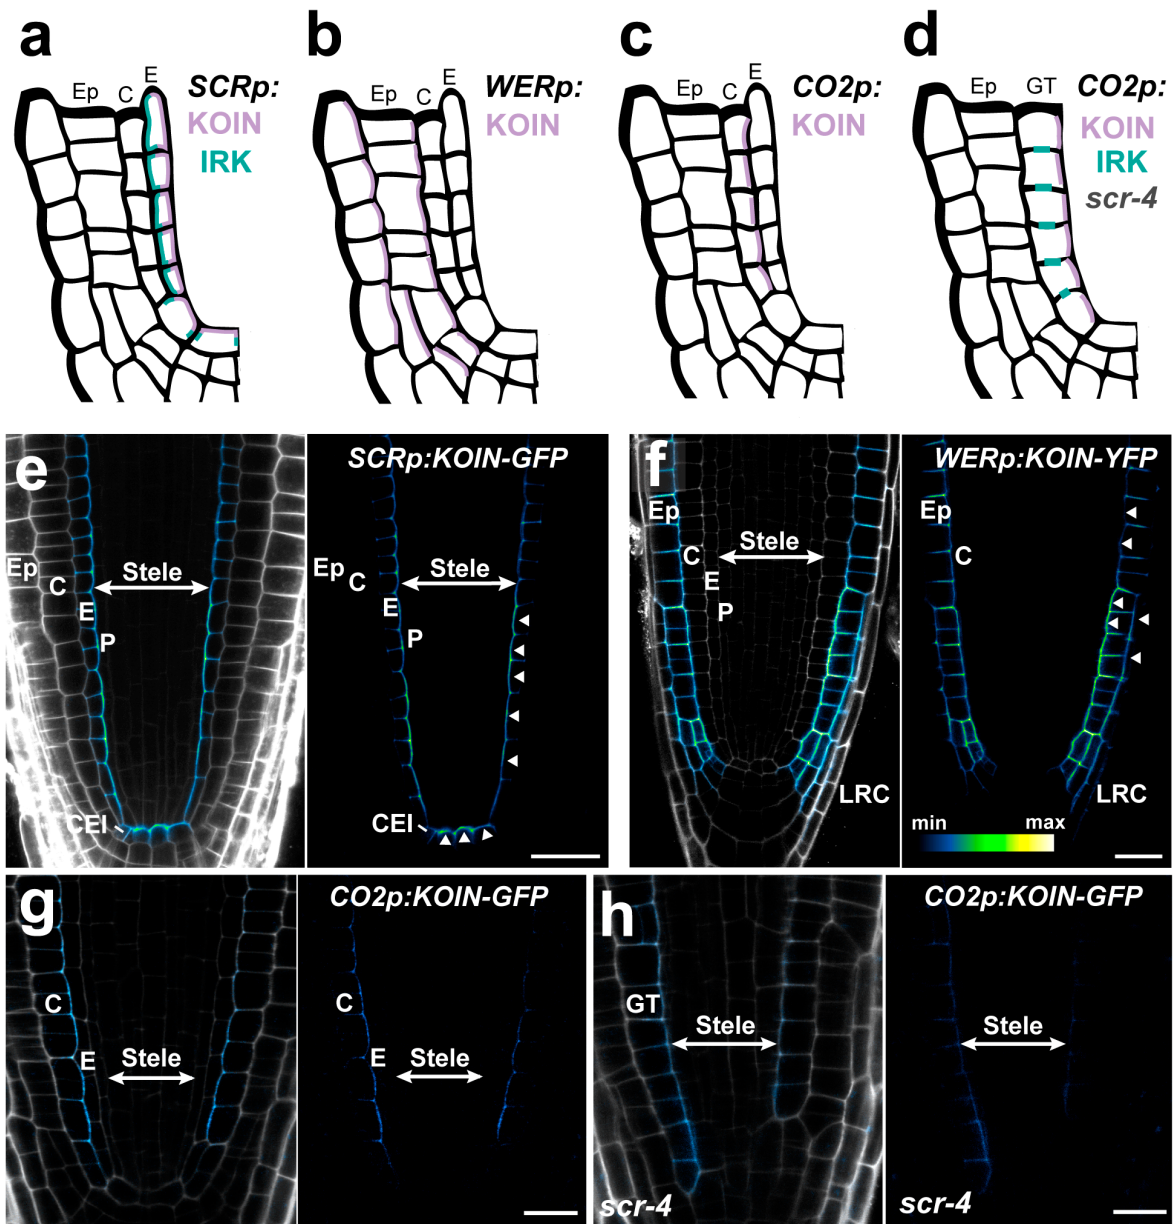

92

93 **Supplementary Fig. 4: KOIN-GFP is localized to the inner lateral domain**  
 94 **regardless of cell type.** (a-d) Schematics of a portion of the Arabidopsis root tip  
 95 showing KOIN and (a, d) IRK localization upon cell layer-specific misexpression in  
 96 Col-0 (a-c) and *scr-4* (d). (e-h) Confocal images of the median longitudinal sections  
 97 of (e-g) WT and (h) *scr-4* root meristems (at 6 d.p.s.) expressing KOIN-GFP under  
 98 cell layer-specific promoters (a, e) *SCRp*, (b, f) *WERp*, (c, d, g, h) *CO2p*. Adjacent  
 99 panels show merged images of green fluorescent protein (GFP, fluorescence

100 intensity color scale) and PI stain (gray scale) followed by GFP alone. Scale bars:  
101 (e, f) 20  $\mu\text{m}$ , (g, h) 10  $\mu\text{m}$ . Images are representative of the results obtained in  
102 experiments performed 3 times where at least 15 plants/condition were examined  
103 per replicate.



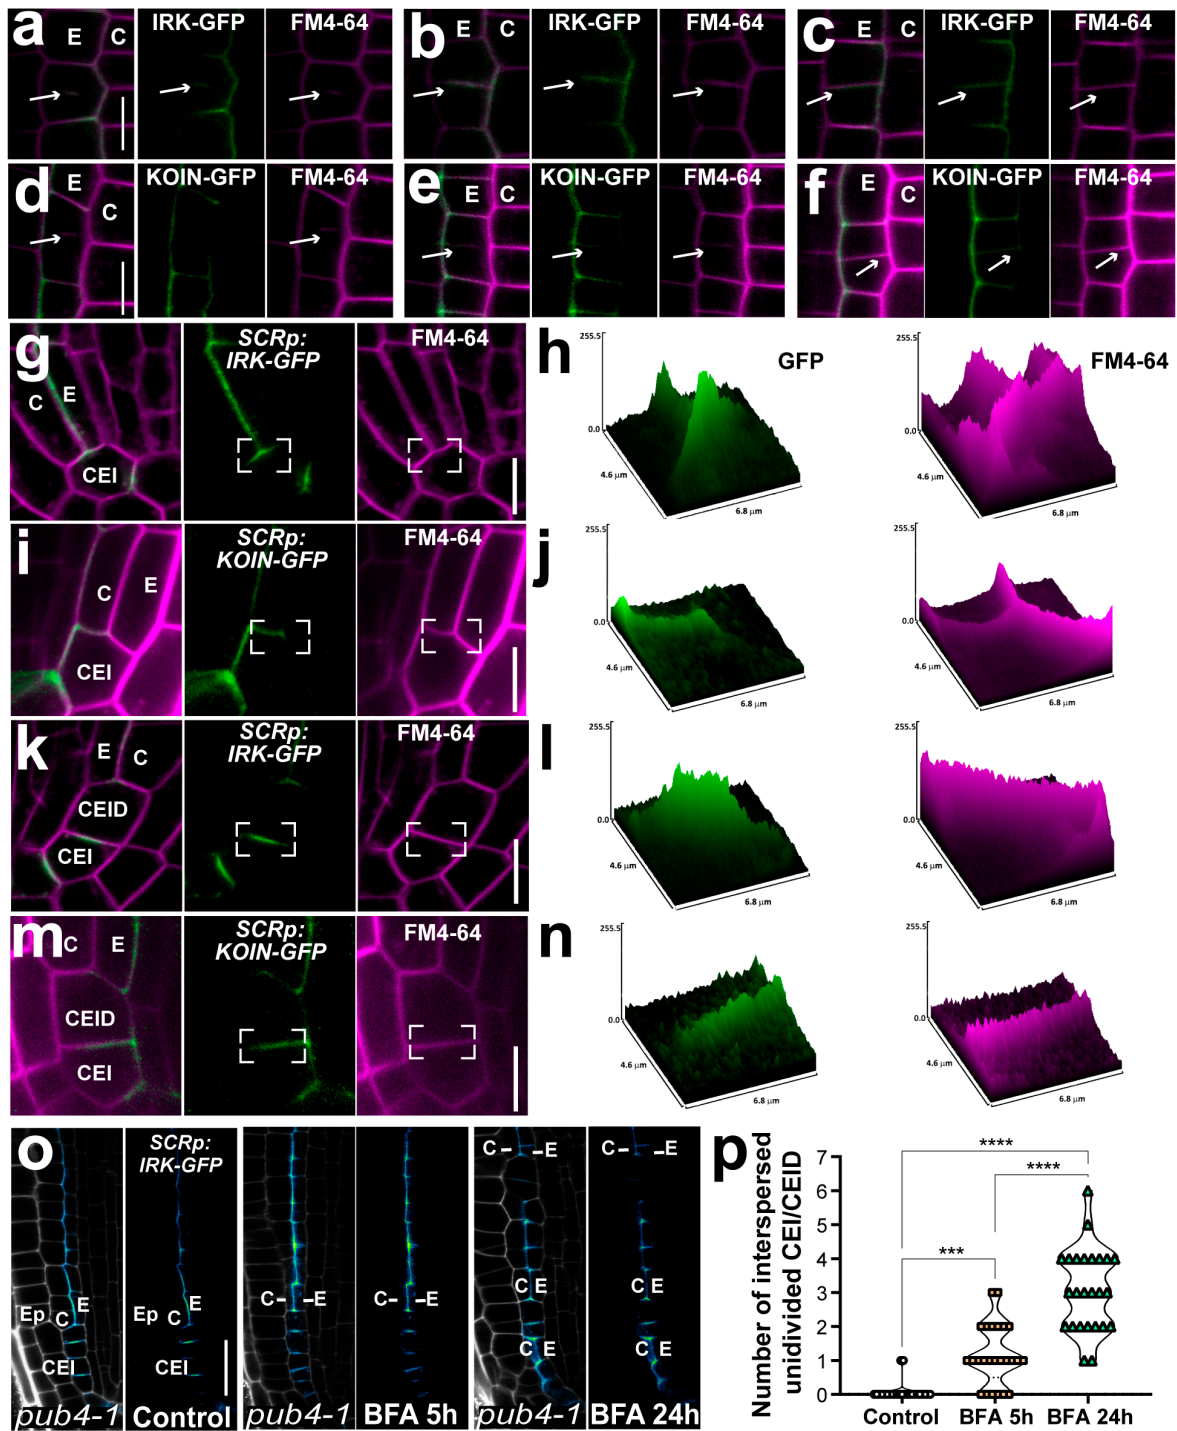

104

105 **Supplementary Fig. 5: IRK and KOIN are differentially distributed in new cell**  
 106 **membranes during proliferative and formative cell divisions. (a-f, g, i, k, m)**  
 107 **Confocal images of cells from roots expressing *SCRp:IRK-GFP* or *SCRp:KOIN-***  
 108 ***GFP* and pulse labeled with FM4-64 for 15 min. (h, j, l, n) Surface plots of linear**  
 109 **fluorescence intensities for IRK-GFP or KOIN-GFP (green) and FM4-64 (magenta)**

110 during various formative cell divisions in boxed regions in (g, k, i, m). (a-c) IRK-  
111 GFP or (d-f) KOIN-GFP and FM4-64 distribution at different stages of cell plate  
112 formation during proliferative (transverse anticlinal) cell divisions. Distribution of (g)  
113 IRK-GFP or (i) KOIN-GFP at the shootward membrane of the CEI. (h) Surface plot  
114 showing IRK-GFP and FM4-64 at the intersection between CEI-Endodermis-Cortex  
115 cells and (j) KOIN-GFP accumulation at the shootward face of the CEI in contact  
116 with the cortex cell. (k-l) IRK-GFP centralized accumulation at the membranes  
117 between the CEI and CEID while FM4-64 is evenly distributed. (m-n) KOIN-GFP  
118 distribution at the membranes between the CEI and CEID with higher signal  
119 towards the inner membranes, while FM4-64 signal is evenly distributed. (o)  
120 Confocal images of *pub4-1* root tips expressing *SCRp:IRK-GFP* (GFP with  
121 fluorescent intensity color scale) and stained with PI (gray) merged and GFP alone.  
122 (Left to right) *pub4-1* root tips under control conditions (DMSO) and treated with 50  
123  $\mu$ M BFA for 5 h and 24 h. (p) Quantification of the number of CEI/CEID cells that  
124 are interspersed with cells that have already divided to form endodermis and cortex  
125 in *pub4-1* under these conditions (25 roots/condition). Significance 1-4 stars  $P <$   
126 0.05 calculated by one-way ANOVA using Turkey's multiple comparison test.  
127 Scale bars: 5  $\mu$ m, except (o) 20  $\mu$ m. Abbreviations: C, cortex; E, endodermis; CEI,  
128 cortex/endodermis initial; CEID, CEI daughter. Images displayed are  
129 representative of experiments replicated at least 3 times with each replicate  
130 containing at least 15 plants/condition.



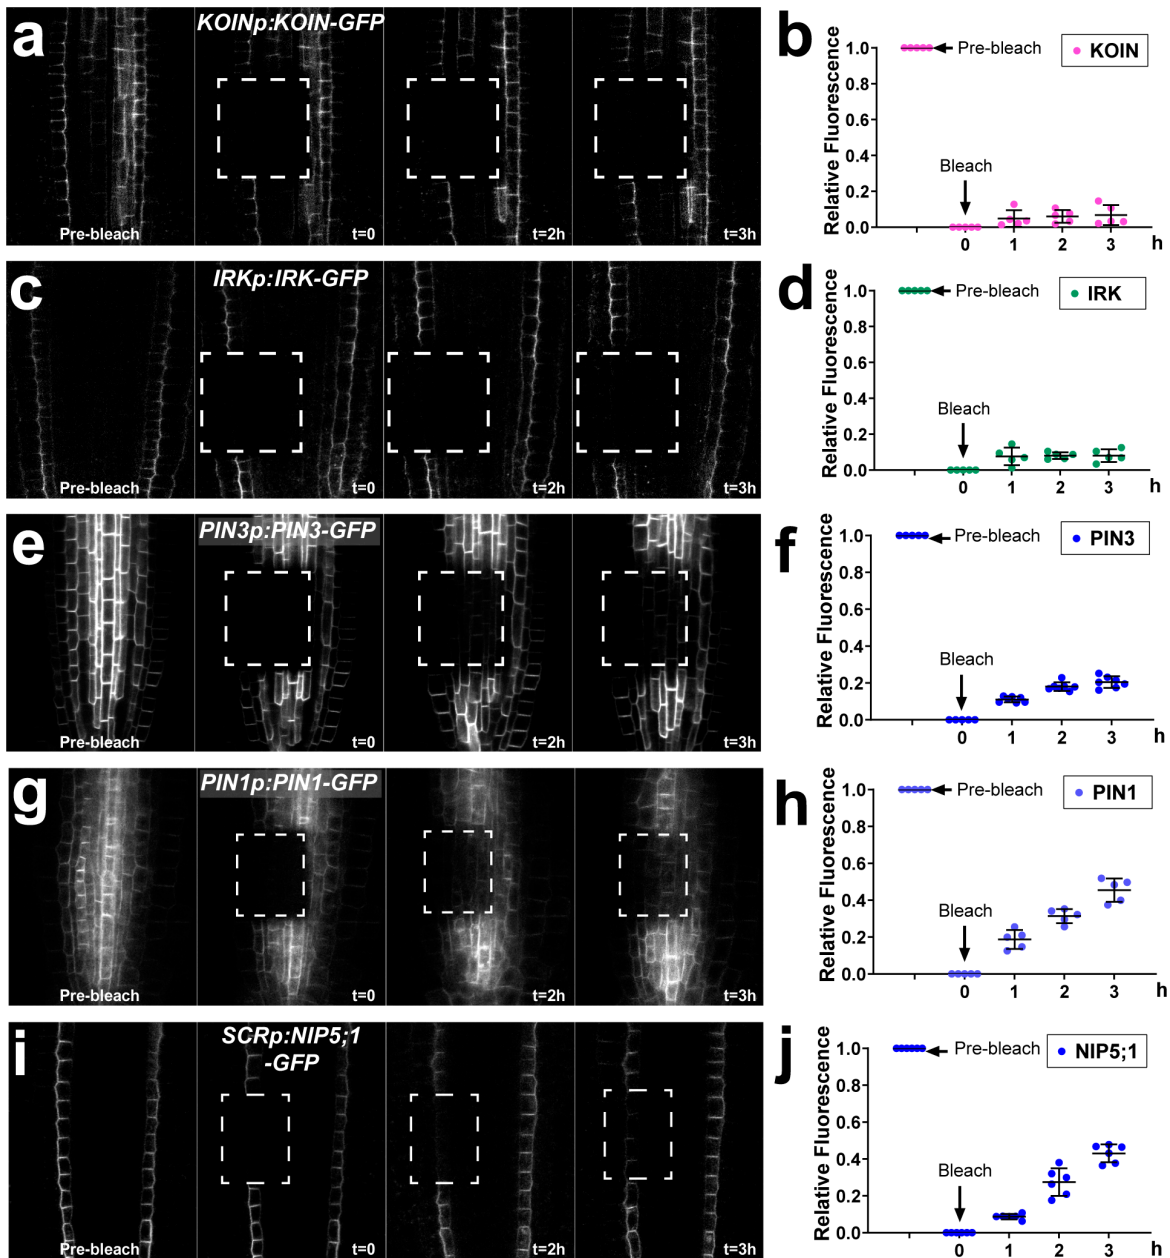

131

132 **Supplementary Fig. 6: IRK-GFP and KOIN-GFP show little recovery at the PM**  
 133 **after photobleaching.** Representative images from FRAP experiments of  
 134 endogenously expressed (a) IRK-GFP, (c) KOIN-GFP, (e) PIN3-GFP, (g) PIN1-GFP,  
 135 and (i) *SCRp* expressed NIP5;1-GFP. (Left to right) images of root pre-bleach, then  
 136 immediately after bleaching (t=0) and 1 and 2 hours after with photobleached area  
 137 indicated by dashed square. (b, d, f, h, j) Dot plots showing relative fluorescent signal

138 recovery (with t=0 set to zero and pre-bleach set to 1) of 15 roots/genotype. Bars  
 139 represent mean with SD values.

140

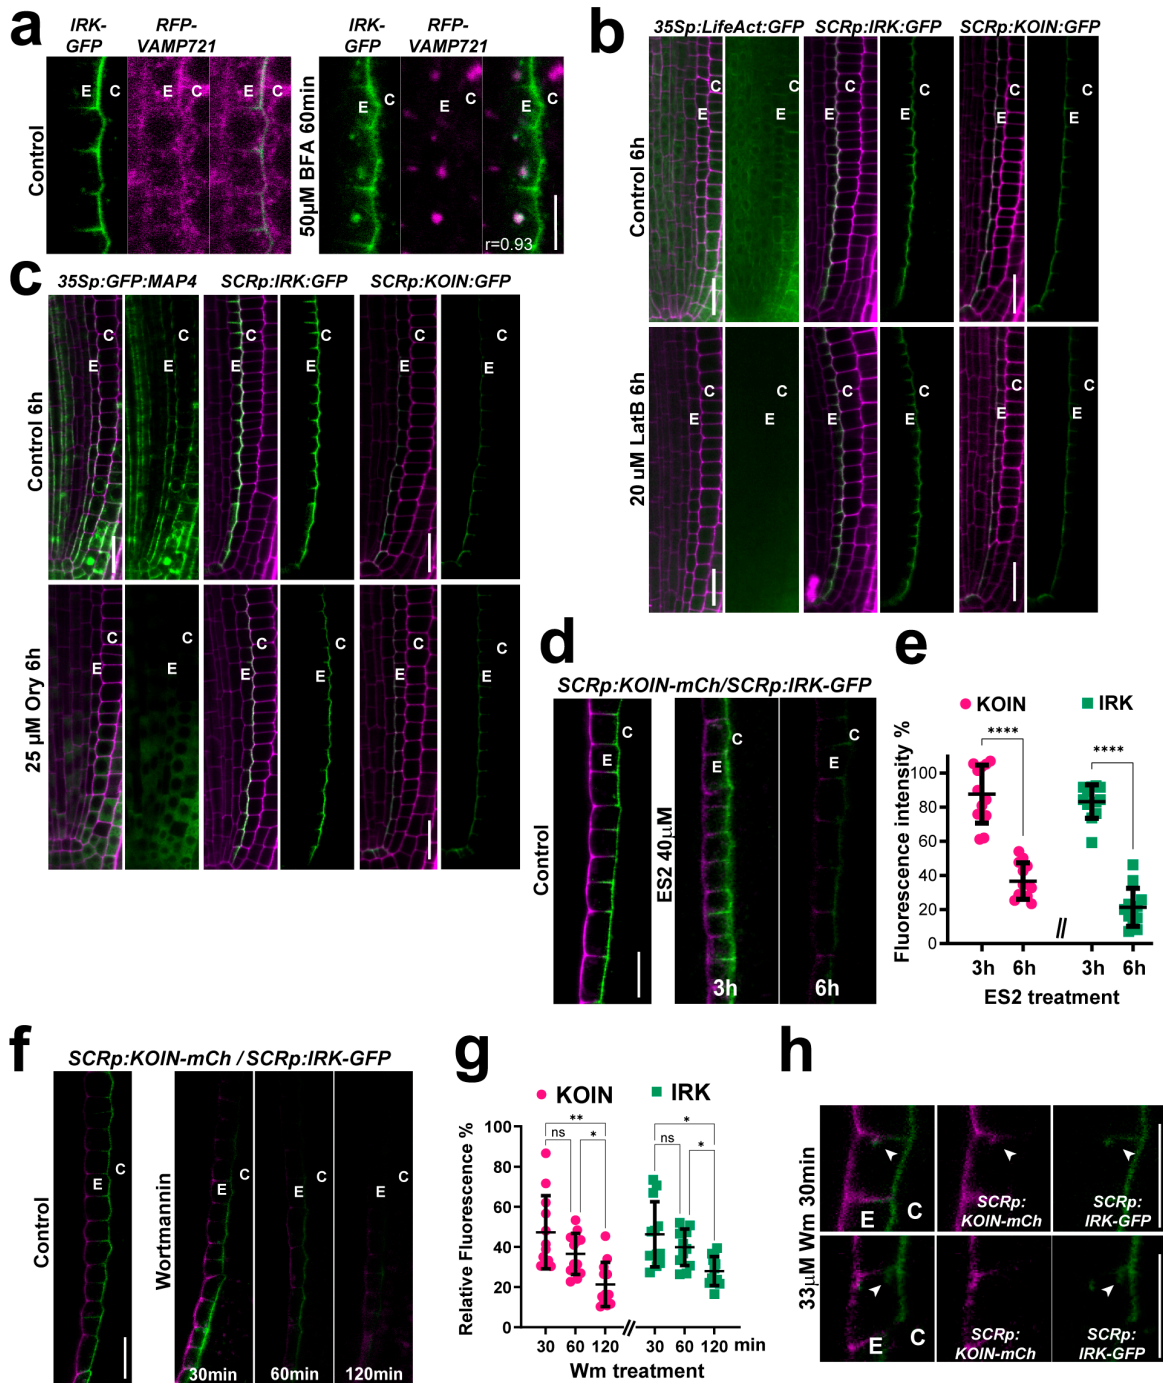

141

142 **Supplementary Fig. 7: Chemical treatments in IRK-GFP and/or KOIN-GFP**  
 143 **expressing roots.** (a) Consecutive panels show confocal images of root tissues

144 expressing *SCRp:IRK-GFP* (green) and RFP-VAMP721 (magenta) and the merged  
145 images under controls and BFA treatment. Upon BFA treatment IRK-GFP and RFP-  
146 VAMP721 colocalize with a Pearson correlation coefficient of  $r=0.93$ . (b)  
147 Consecutive panels show confocal images of F-actin (LifeAct-GFP, green),  
148 *SCRp:IRK-GFP* or *SCRp:KOIN-GFP* (green) with PI counterstain (magenta) during  
149 6h treatment with DMSO (control) or the actin depolymerizing drug Latrunculin B  
150 (LatB). (c) Consecutive panels show confocal images of microtubule marker  
151 (35S:GFP-MAP4, green), *SCRp:IRK-GFP*, and *SCRp:KOIN-GFP* (green) in root  
152 cells with PI counterstain (magenta) during 6 h treatment with DMSO (control) or the  
153 microtubule disrupting drug Oryzalin (Ory). (d) Roots expressing *SCRp* driven IRK-  
154 GFP and KOIN-mCh treated with 40  $\mu$ M ES2 for 3 h and 6 h. (e) Graph of IRK-GFP  
155 and KOIN-mCh signal intensity at the PM in ES2-treated endodermal cells. The  
156 mean values of the signal intensities of 20 roots/time point were normalized to those  
157 of 20 control roots (expressed as percentage, %). Graph and images show  
158 representative results of experiments replicated 3 times with  $n = 20$  plants/condition,  
159 bars represent the SD values and individual values are displayed. \*\*\*\* =  $p < 0.0001$   
160 calculated by two-way ANOVA. (f) Accumulation of *SCRp:IRK-GFP* (green),  
161 *SCRp:KOIN-mCh* (magenta) at the PM in control conditions or after treatment with  
162 33  $\mu$ M Wortmannin (Wm), a drug that inhibits the synthesis of phosphoinositols  
163 (PI4P, PI3P). (g) Quantification of the fluorescence intensity of IRK-GFP (green) and  
164 KOIN-mCh (magenta) after 30, 60 and 120 min of Wm treatment expressed as a  
165 percentage relative to control conditions (graphs and images show representative  
166 results of experiments replicated three times with  $n = 12$  plants/condition). Bars  
167 represent the SD and individual values are shown. \*\* =  $p < 0.001$ , \* =  $p < 0.05$ , ns =  
168 not significant calculated by two-way ANOVA. (h) Intracellular accumulation of IRK-  
169 GFP (green) or KOIN-mCh (magenta) in endodermal cells after 30 min Wm  
170 treatment. The arrowhead shows co-localization or independent localization of IRK-  
171 GFP and KOIN-mCh in doughnut shape structures. Scale bars: (a, d, f, h) 10  $\mu$ m and  
172 (b, c) 20  $\mu$ m.

173

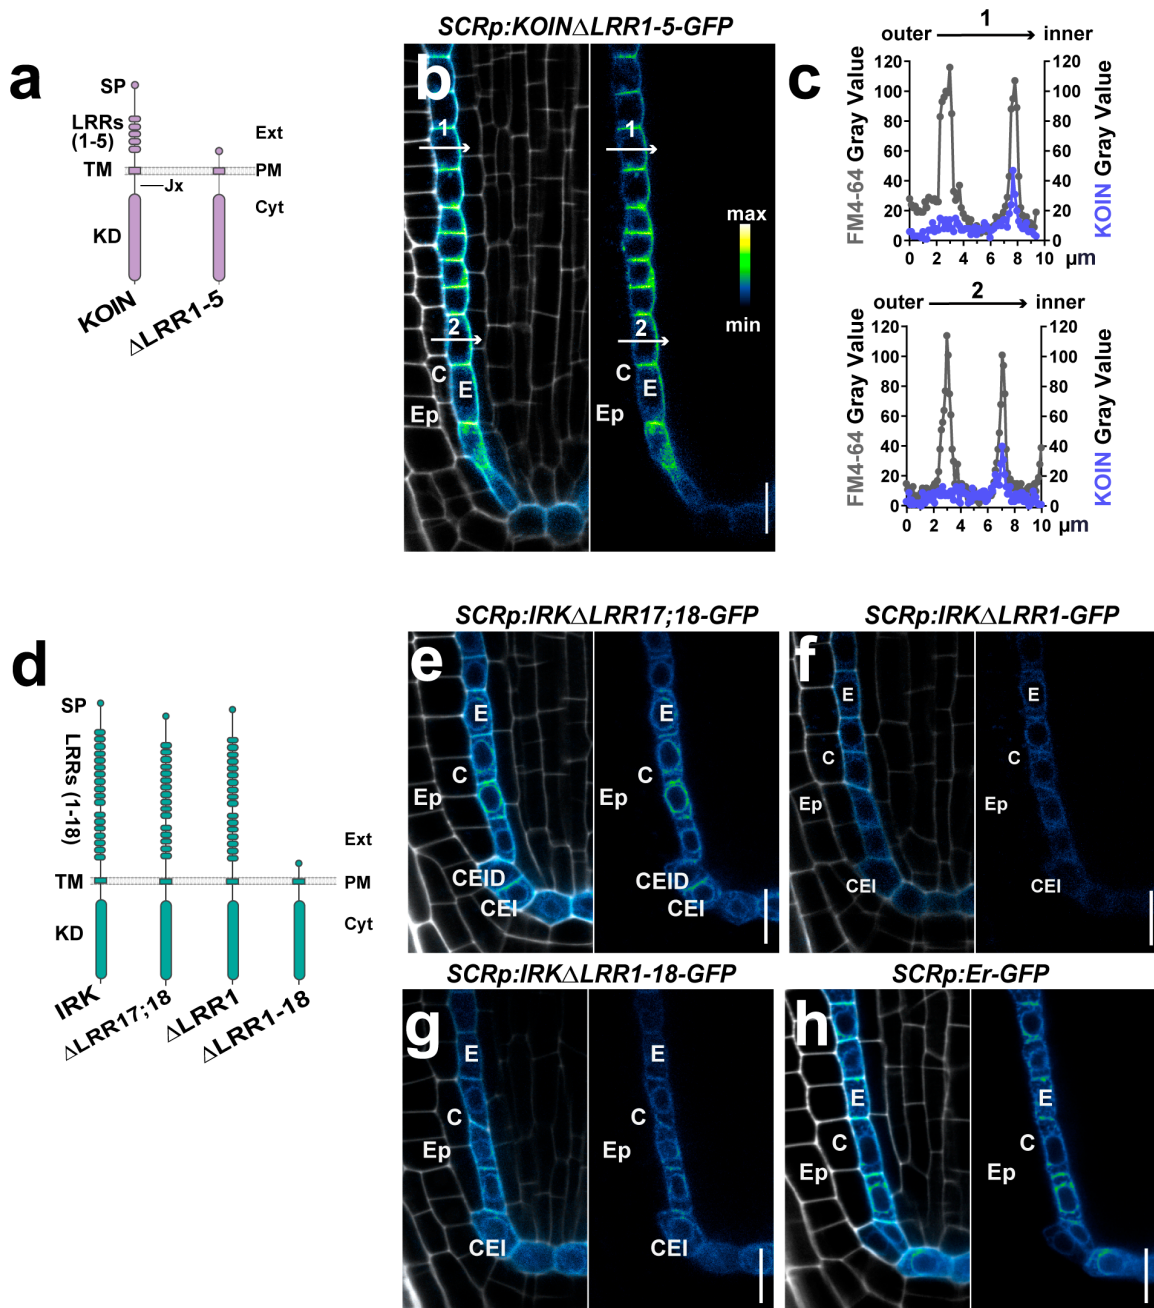

174

175 **Supplementary Figure 8: Deletion of KOIN and IRK LRR domains differentially**  
 176 **impacts protein accumulation at the plasma membrane.** (a) Schematics of KOIN  
 177 domain structure (purple) and with the LRR domains deleted (KOINΔLRR1-5). (b)  
 178 Adjacent panels show confocal images of endodermal (*SCRp*) expressed  
 179 KOINΔLRR1-5-GFP signal (intensity false colored) in roots counterstained with  
 180 FM4-64 (gray) merged and GFP alone. (c) Quantification of the fluorescence

181 intensity of KOINΔLRR1-5-GFP (purple) and FM4-64 (gray) across two endodermal  
182 cells marked 1 and 2 (white arrows). The graphs show that only in the inner lateral  
183 face has a peak of KOINΔLRR-GFP fluorescence that coincides with the peak of  
184 FM4-64 labeling the PM. This indicates that the proportion of protein that is not  
185 retained in the ER (basal intracellular GFP signal) localizes to the inner PM. (d)  
186 Schematics of IRK domain structure (green) and with LRR deletions: LRR domain  
187 17-18 (IRKΔLRR17-18); LRR domain 1 (IRKΔLRR1), and all LRR domains  
188 (IRKΔLRR1-18). (e-h) Adjacent panels show confocal images of roots with GFP  
189 signal (signal intensity false colored) and counterstained with PI (gray) merged and  
190 GFP alone. Endodermal (*SCRp*) expressed IRKΔLRRs all show intracellular  
191 distribution that coincides with (h) *SCRp* driven endoplasmic reticulum-localized  
192 GFP (ER-GFP), which directs GFP to remain in that organelle. Abbreviations: signal  
193 peptide (SP), transmembrane domain (TM), juxtamembrane domain (Jx), kinase  
194 domain (KD), epidermis (Ep), cortex (c), endodermis (e), cortex/endodermis initial  
195 (CEI), and CEI daughter (CEID). Scale bars: 10 μm. Images displayed in this figure  
196 are representative of observations made in at least 20 plants/genotype and for each  
197 genotype at least 3 independent transgenic lines were analyzed.



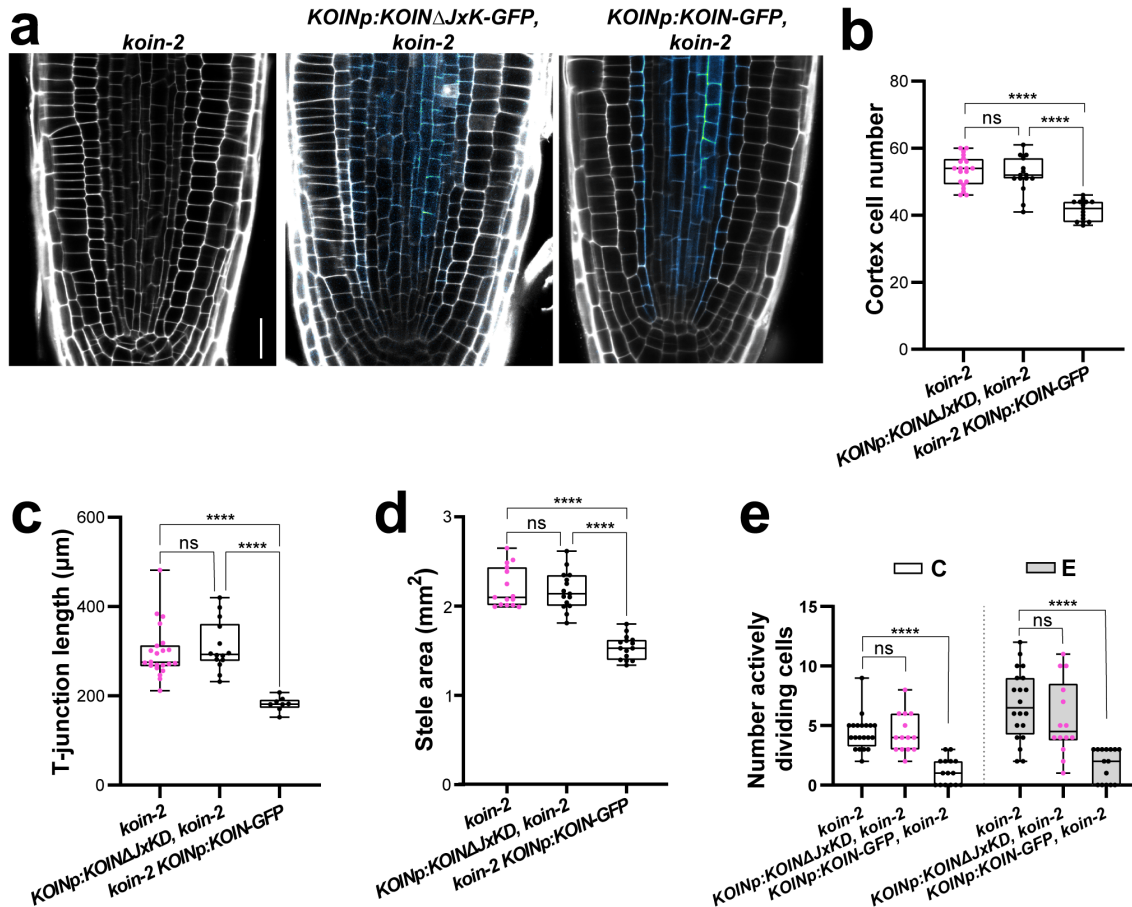

198

199

200

201

202

203

204

205

206

207

208

209

210

211

212

**Supplementary Figure 9: Endogenously expressed KOIN truncation, *KOINΔJxKD*, had non-polar localization and does not rescue *koin* phenotypes.**

(a) Confocal images of median longitudinal optical sections from root tips of *koin-2* and *koin-2* expressing *KOINp* driven *KOINΔJxKD-GFP* and *KOIN-GFP*. Merged images of roots stained with PI (gray) and GFP with intensity color scale. Scale bar: 20  $\mu\text{m}$ . (b, c, d) Quantification of cortex cell number, T-junction length, and stele area in these genotypes with bars indicating min./max. values, in the boxes median values are indicated with a line, and single values are represented as dots. Data shown from a single representative biological replicate (of three) each containing 15-20 roots/genotype. Abbreviations: ns = no significant difference and 1-4 stars the statistical significance ( $P < 0.05$  calculated by one-way ANOVA using Dunnett's multiple comparison test). (e) Quantification of cells in active stages of cell division in *koin-2*, and *koin-2* expressing *KOINp* driven *KOINΔJxKD-GFP* and *KOIN-GFP* (20 roots/genotype) counted from the QC 250  $\mu\text{m}$  upwards. 1-4 stars the statistical

213 significance (\* is  $P < 0.05$  calculated by two-way ANOVA and Tukey's multiple  
 214 comparisons test).  
 215

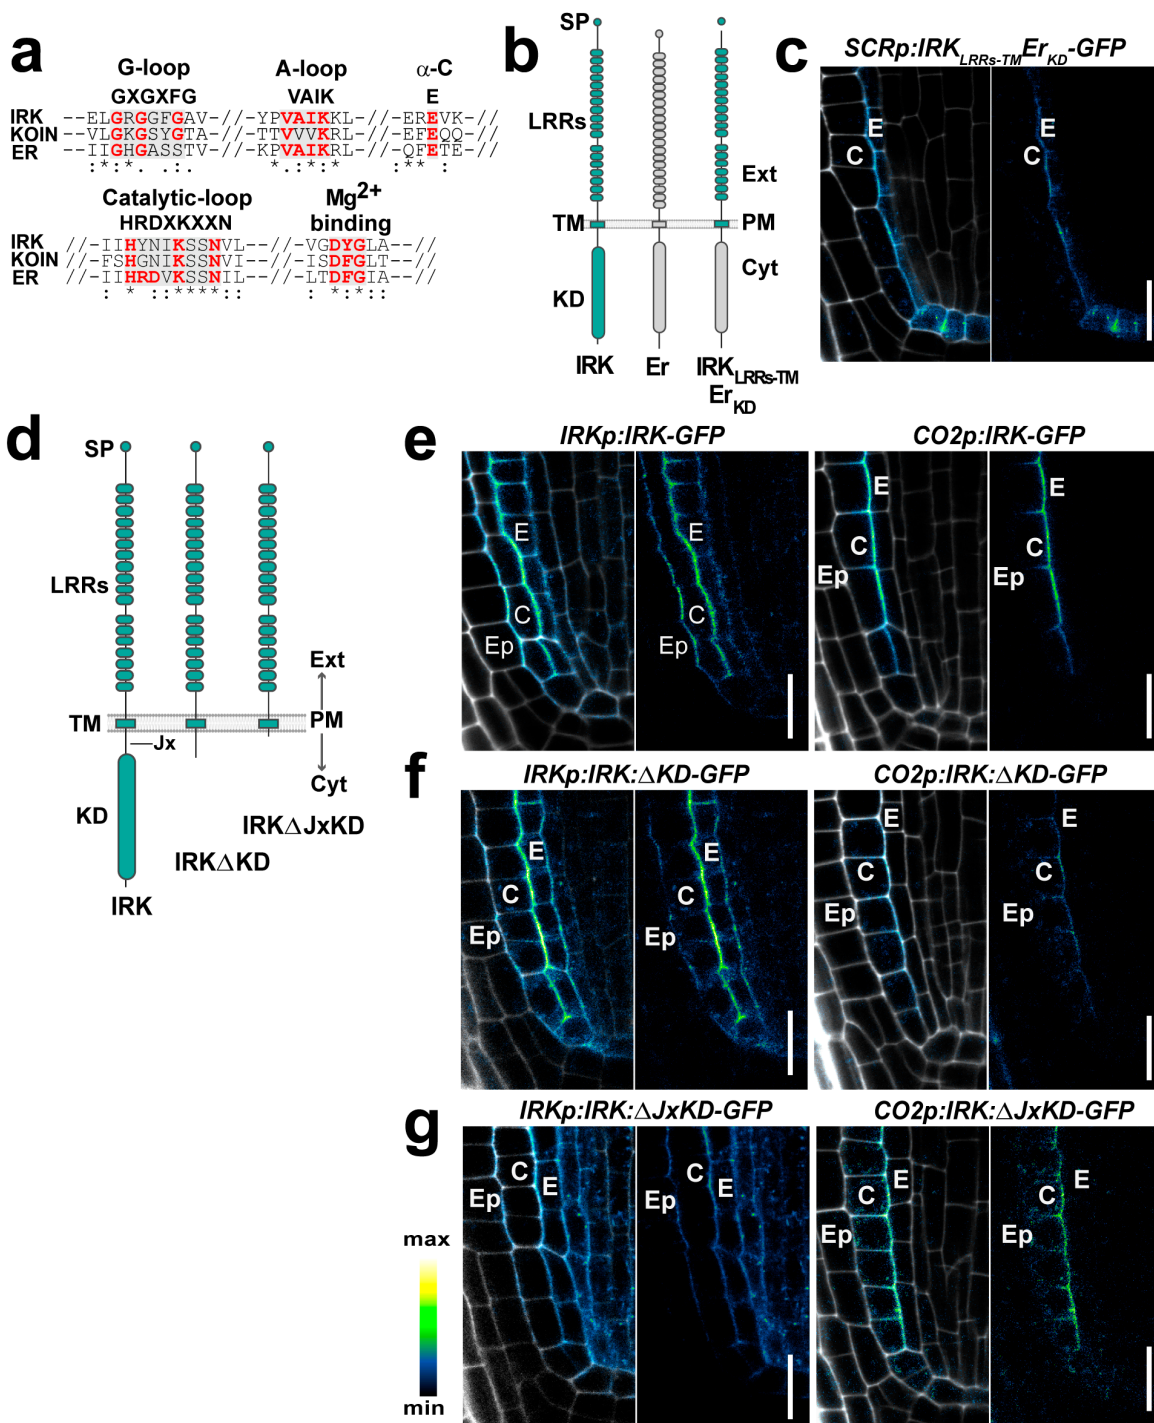

216

217 **Supplementary Figure 10: The presence of the IRK extracellular domain is**  
 218 **sufficient for polar protein accumulation at the plasma membrane. (a) Amino**

219 acid alignment of regions of the IRK, KOIN, and ERECTA kinase domains showing  
220 key functional motifs (gray boxes) that participate in ATP binding or hydrolysis. Key  
221 residues are indicated (red) in the glycine-rich G-loop, the adenine binding A-loop,  
222 the putative conserved glutamic acid-E in the alpha C-helix ( $\alpha$ -C), the catalytic loop,  
223 and the Mg<sup>2+</sup> ion-binding motif. IRK and KOIN, atypical kinases, have non-  
224 conserved residues in the catalytic loop, whereas active kinases, like ERECTA, have  
225 the conserved residues in the catalytic loop. (b) Protein structure diagrams of IRK  
226 (green), ERECTA (gray), and the IRK/ERECTA chimera. (c) Confocal images  
227 showing *SCRp* expressed IRK<sub>LRRS-TM</sub>ERECTA<sub>KD</sub>-GFP distribution in the root tip with  
228 adjacent panels showing GFP+PI merged or GFP alone. (d) Protein structure  
229 diagrams of IRK and truncated IRK lacking the kinase domain (IRK $\Delta$ KD) or the  
230 juxtamembrane (Jx) and kinase domain (IRK $\Delta$ JxKD). (e-g) Paired confocal images  
231 show GFP signal (intensity color scale) and the merged images with GFP+PI  
232 counterstaining (gray). Proteins expressed under *IRKp* or cortex-specific *CO2p*.  
233 Localization of (e) full-length IRK-GFP, (f) IRK $\Delta$ KD-GFP and (g) IRK $\Delta$ JxKD-GFP.  
234 Scale bars: 10  $\mu$ m. Abbreviations: signal peptide (SP), transmembrane domain (TM),  
235 kinase domain (KD), extracellular (Ext), PM (PM), cytoplasm (Cyt), Ep, epidermis,  
236 C, cortex; and E, endodermis. [Confocal images displayed are representative of](#)  
237 [observations made in at least 20 plants/genotype and for each genotype at least 3](#)  
238 [independent transgenic lines were analyzed.](#)



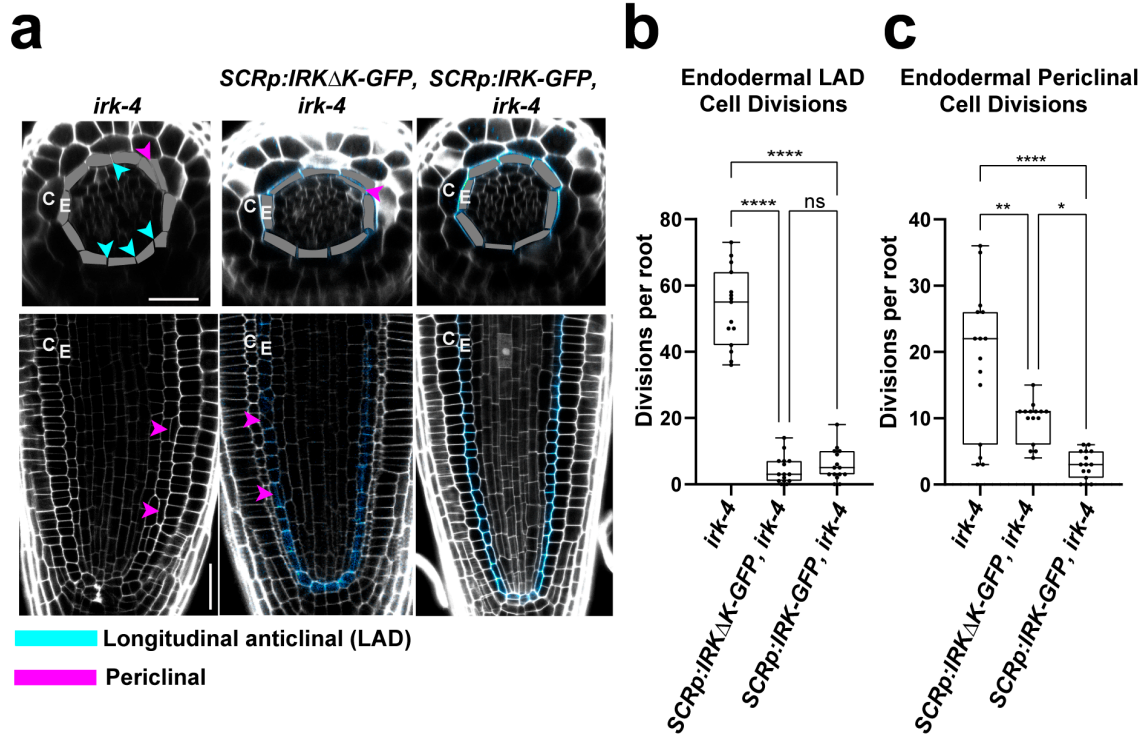

239

240 **Supplementary Figure 11. Endodermal expressed IRK truncation, IRKΔKD, is**  
 241 **polarized and partially rescues *irk-4* phenotypes.** (a) Confocal images of  
 242 transverse and median longitudinal optical sections from root tips of *irk-4* and *irk-4*  
 243 expressing *SCRp* driven IRKΔKD-GFP or IRK-GFP. Merged images of roots stained  
 244 with PI (gray) and GFP with intensity color scale with endodermal longitudinal  
 245 anticlinal (cyan arrowheads) and periclinal (magenta arrowheads) cell divisions  
 246 indicated and endodermal cells highlighted in upper panels. Quantification of  
 247 endodermal (b) longitudinal anticlinal and (c) periclinal cell divisions (n = 20  
 248 roots/genotype). Graphs b and c show representative results of experiments  
 249 performed in ≥ 3 independent replicates, bars indicate max/min values and 1-4 stars  
 250 statistical significance P value < 0.05 (\*), ns = not significant (two-way ANOVA and  
 251 Tukey's multiple comparisons test). Scale bars: 20 μm. Abbreviations: cortex (c),  
 252 endodermis (e).

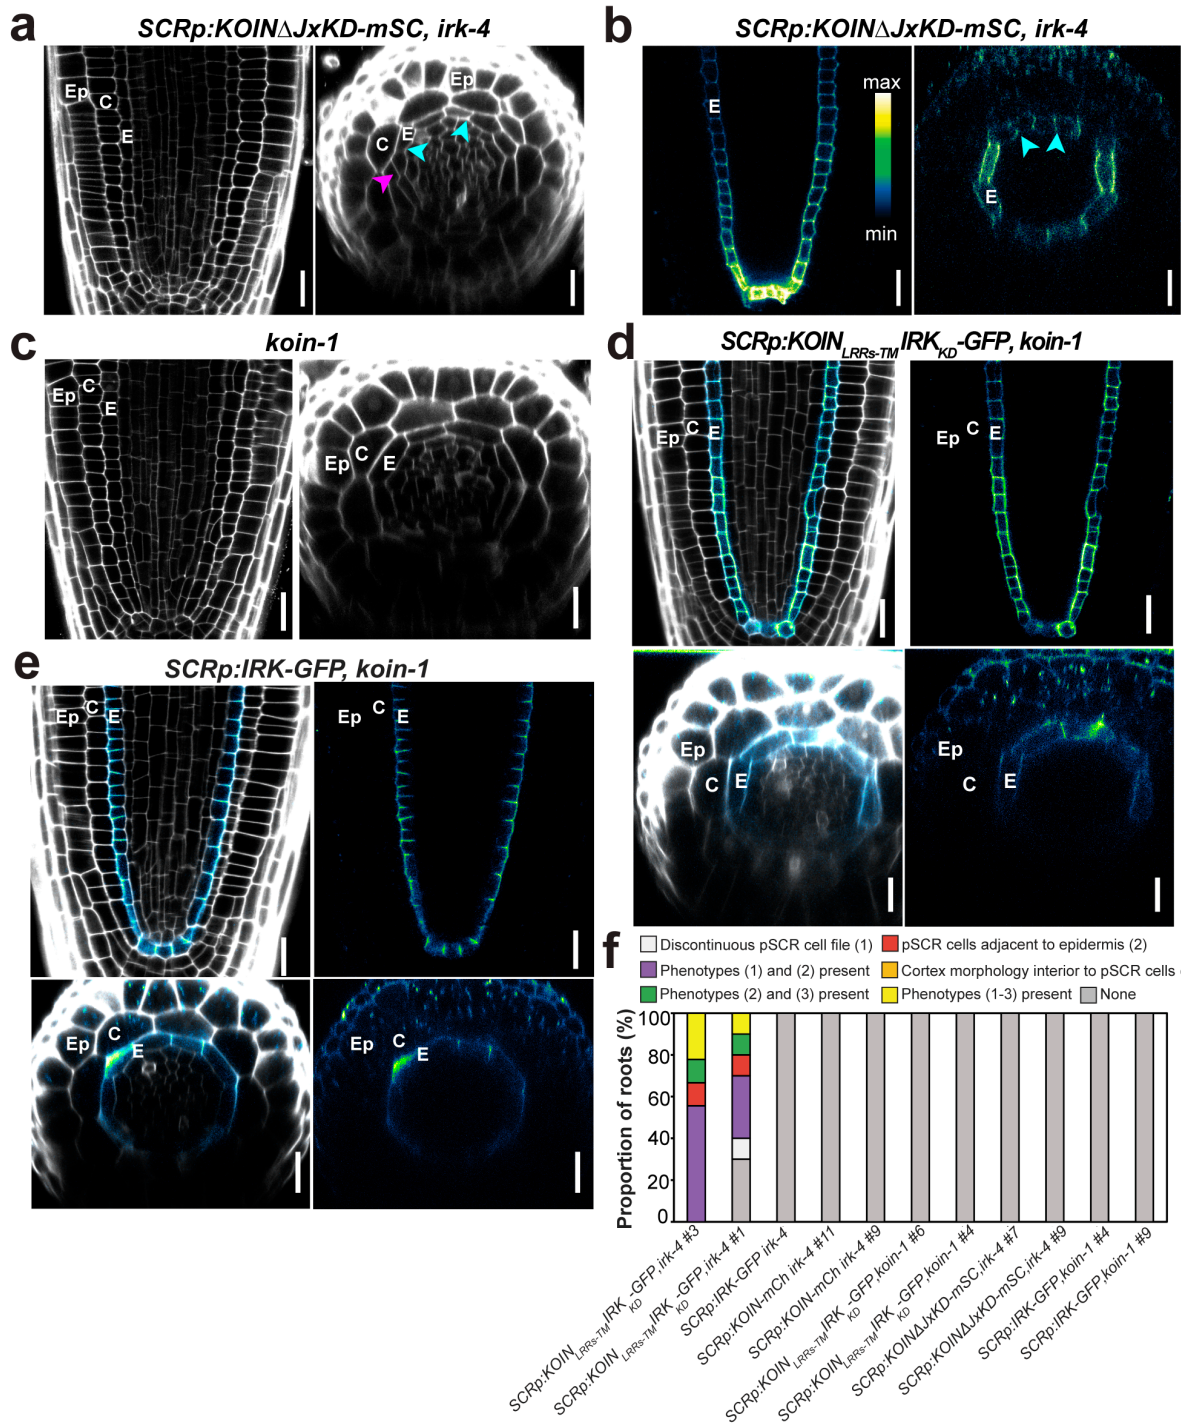

253

254

255

256

257

258

**Supplementary Fig. 12. No additional cell division phenotypes are observed upon endodermal expression of the KOIN/IRK-GFP chimera in *koin*.** (a-e) Confocal images of median longitudinal and transverse sections of (a, b) *irk-4* and (c-e) *koin-1* mutant roots stained with PI (gray) and/or fluorescence (intensity false colored). (a, b) *irk-4* roots expressing *SCRp:KOIN $\Delta$ JxKD-mSC* (a) stained with PI

259 (gray) and showing (b) KOIN $\Delta$ JxKD-mSC localization with endodermal longitudinal  
260 anticlinal (cyan arrowheads) and periclinal (magenta arrowheads) cell divisions. (C-  
261 E) *koin-1* and *koin-1* roots expressing *SCRp:KOIN<sub>LRRS-TM</sub>IRK<sub>KD</sub>-GFP* and  
262 *SCRp:IRK:GFP*. (f) Quantification of roots exhibiting any or all of the enhanced cell  
263 division phenotypes (see also Figure 6): (1) discontinuous cell files or rings  
264 expressing *SCRp*, (2) cells expressing *SCRp* immediately adjacent to the epidermis,  
265 and/or (3) cells with cortex morphology interior to cells expressing *SCRp* in various  
266 genotypes. Note these phenotypes are only present in *irk-4* expressing this chimera.  
267 Data shown from a single representative biological replicate (n = 9-10  
268 roots/genotype). Abbreviations: (Ep) epidermis; (c) cortex; (e) endodermis. Scale  
269 bar= 20  $\mu$ m.

270 **Supplementary Table 1: Summary of chemical treatments to examine protein trafficking contribution to KOIN and**  
 271 **IRK polarity.**

| Small molecule              | Molecular and cellular target                                                                                                                                                                       | Treatment Conditions                                                                            | Consequences/Visualization                                                                                                                                                                          | Effect on IRK and KOIN trafficking                                                                  | Conclusions                                                                                                   |
|-----------------------------|-----------------------------------------------------------------------------------------------------------------------------------------------------------------------------------------------------|-------------------------------------------------------------------------------------------------|-----------------------------------------------------------------------------------------------------------------------------------------------------------------------------------------------------|-----------------------------------------------------------------------------------------------------|---------------------------------------------------------------------------------------------------------------|
| <b>Brefeldin A (BFA)</b>    | Binds the SEC7 domain of a subset of the GEFs, causing the inhibition of Golgi and post-Golgi trafficking that affects delivery to the PM of a subset of de novo synthesized and recycled proteins. | <b>50 <math>\mu</math>M 1 h</b>                                                                 | Agglomerations of Golgi and TGN compartments. <sup>1,2</sup>                                                                                                                                        | IRK, but not KOIN, is observed in BFA bodies in the endodermis.                                     | IRK, but not KOIN, is secreted by a pathway partially sensitive to BFA.                                       |
|                             |                                                                                                                                                                                                     | <b>50 <math>\mu</math>M 4-5 h</b>                                                               | Cell plate formation is disrupted, delays in new PM and cell wall positioning <sup>1</sup> .                                                                                                        | IRK, but not KOIN, is agglomerated near the new PMs after cell division affecting IRK accumulation. | During cell division, IRK but not KOIN, is secreted to the new PM via a BFA sensitive pathway.                |
|                             |                                                                                                                                                                                                     | <b>50 <math>\mu</math>M 24 h</b>                                                                | Cell divisions eventually occur, but with some altered cell division plane orientation and numerous binucleated cells <sup>1</sup> .                                                                | IRK is observed in newly formed PM after CEIDs have divided.                                        | BFA delays CEID division in <i>pub4-1</i> allowing visualization of IRK lateral polarity in endodermal cells. |
| <b>Cycloheximide (CHX)</b>  | Binds the 60S ribosome tRNA E-site inhibiting protein synthesis                                                                                                                                     | <b>50 <math>\mu</math>M 2 h</b>                                                                 | Decreased production of newly synthesized protein <sup>3</sup> .                                                                                                                                    | IRK and KOIN accumulation at the PM decreases.                                                      | IRK and KOIN accumulation at the PM is affected by protein synthesis inhibition.                              |
| <b>CHX+ (CHX+BFA)</b>       | Inhibition of protein synthesis prior to BFA inhibition of protein secretion.                                                                                                                       | <b>50 <math>\mu</math>M CHX 1 h + (50 <math>\mu</math>M CHX + 50 <math>\mu</math>M BFA) 1 h</b> | BFA agglomerations now contain mainly proteins internalized from the PM because of the inhibition of secretion back to the PM (recycling) <sup>4</sup> .                                            | IRK is no longer observed in BFA agglomerations.                                                    | IRK agglomeration in BFA bodies corresponds to newly synthesized protein.                                     |
| <b>Endosidin 16 (ES16)</b>  | Binds RABA2A causing inhibition of exocytosis for a subset of newly synthesized and recycling proteins.                                                                                             | <b>ES16 15 <math>\mu</math>M 3 h</b>                                                            | Agglomeration of Golgi and TGN compartments <sup>5</sup> .                                                                                                                                          | KOIN, but not IRK, is observed in ES16 agglomerations.                                              | KOIN, but not IRK, is secreted via a pathway sensitive to ES16.                                               |
| <b>Endosidin 2 (ES2)</b>    | Binds the EXOCYST subunit EXO70A1 inhibiting exocytosis of a subset of newly synthesized and recycled proteins.                                                                                     | <b>ES2 40 <math>\mu</math>M 3 h</b>                                                             | Agglomeration of vesicles near the Golgi and TGN <sup>6</sup> .                                                                                                                                     | IRK and KOIN are observed in ES2 agglomerations.                                                    | Both IRK and KOIN are secreted by an EXO70A1-dependent mechanism(s).                                          |
|                             |                                                                                                                                                                                                     | <b>ES2 40 <math>\mu</math>M 3.5 - 6 h</b>                                                       | PM protein turn-over is visibly affected due to the re-direction of newly synthesized protein traffic to the vacuole <sup>7</sup> .                                                                 | IRK and KOIN accumulation at the PM is greatly decreased.                                           | Newly synthesized IRK and KOIN are likely degraded.                                                           |
| <b>Wortmannin (Wm)</b>      | Affects the activity of phosphatidylinositol 3- (PI3K) and 4- (PI4K) kinases decreasing the amount of PtdIns3P and PtdIns4P in cellular membranes.                                                  | <b>Wm 33 <math>\mu</math>M 30 min-1 h</b>                                                       | PtdIns3P and PtdIns4P depletion affects TGN and post-Golgi traffic towards the vacuole causing homotypic fusion of compartments leading to characteristic doughnut shaped structures <sup>8</sup> . | IRK and KOIN are observed in doughnut shaped structures.                                            | IRK and KOIN transit to the vacuole through a Wm-sensitive pathway.                                           |
|                             |                                                                                                                                                                                                     | <b>Wm 33 <math>\mu</math>M 2 h</b>                                                              | PtdIns4P depletion also affects EXO70A1 association with the PM interfering with EXOCYST dependent exocytosis <sup>9</sup> .                                                                        | IRK and KOIN accumulation at the PM is greatly reduced.                                             | Both IRK and KOIN secretion to the PM is affected.                                                            |
| <b>Oryzalin (Ory)</b>       | Binds alpha-tubulin, inhibiting microtubule polymerization                                                                                                                                          | <b>Ory 25 <math>\mu</math>M 6 h</b>                                                             | Affects cell division and a subpopulation of the TGN causing small intracellular agglomerations <sup>10</sup> .                                                                                     | IRK and KOIN accumulation at the PM remains unchanged.                                              | IRK and KOIN accumulation at the PM is not affected by inhibition of microtubule or actin polymerization.     |
| <b>Latrunculin B (LatB)</b> | Sequesters actin monomers, inhibiting actin polymerization.                                                                                                                                         | <b>LatB 20 <math>\mu</math>M 6 h</b>                                                            | PIN1 polarization is affected by LatB action <sup>11</sup> .                                                                                                                                        |                                                                                                     |                                                                                                               |

**Supplementary Table 2. Expression vectors generated in this paper.**

| <b>Expression vector</b>                             | <b>Backbone</b> |
|------------------------------------------------------|-----------------|
| KOINp:KOIN-GFP                                       | dpGreen-BarT    |
| SCRp:KOIN-GFP                                        | dpGreen-BarT    |
| SCRp:KOIN-mCh                                        | dpGreen-KanT    |
| WERp:KOIN-3'WER-YFP                                  | dpGreen-BarT    |
| CO2p:KOIN-GFP                                        | dpGreen-BarT    |
| SCRp: KOIN <sub>LRRs-TM</sub> IRK <sub>KD</sub> -GFP | dpGreen-BarT    |
| SCR:KOIN <sub>LRRs</sub> IRK <sub>TM-KD</sub> -GFP   | dpGreen-BarT    |
| SCRp:IRK <sub>LRRs-TM</sub> KOIN <sub>KD</sub> -GFP  | dpGreen-BarT    |
| SCRpIRK <sub>LRRs</sub> KOIN <sub>TM-KD</sub> -GFP   | dpGreen-BarT    |
| IRK <sub>LRRs-TM</sub> ER <sub>KD</sub> -GFP         | dpGreen-BarT    |
| SCRp:IRK $\Delta$ KD-GFP                             | dpGreen-BarT    |
| CO2p:IRK $\Delta$ KD-GFP                             | dpGreen-BarT    |
| IRKp:IRK $\Delta$ KD-GFP                             | dpGreen-BarT    |
| IRKp:IRK $\Delta$ Jx;KD-GFP                          | dpGreen-BarT    |
| CO2p:IRK $\Delta$ Jx;KD-GFP                          | dpGreen-BarT    |
| SCRp: IRK $\Delta$ Jx;KD-GFP                         | dpGreen-BarT    |
| SCRp:KOIN $\Delta$ Jx;KD-mSC                         | dpGreen-KanT    |
| SCRp:IRK $\Delta$ LRR17;18-GFP                       | dpGreen-BarT    |
| SCRp:IRK $\Delta$ LRR1-GFP                           | dpGreen-BarT    |
| SCRp:IRK $\Delta$ LRR1-18-GFP                        | dpGreen-BarT    |
| SCRp:KOIN $\Delta$ LRRs-GFP                          | dpGreen-NorfT   |
| SCRp:IRK <sub>LRRs-TM</sub> KOIN <sub>KD</sub> -GFP  | dpGreen-NorfT   |
| KOINp:KOIN-GFP                                       | dpGreen-NorfT   |
| KOINp: KOIN $\Delta$ Jx;KD-GFP                       | dpGreen-BarT    |

**Supplementary Table 3: Primers used in this study.**

| Primer Purpose                            | Primer name             | Primer sequence (5'-3')         |
|-------------------------------------------|-------------------------|---------------------------------|
| <b>Primers to generate reporters</b>      |                         |                                 |
| IRK promoter region                       | IRKpro_F                | CACAGCCCTTATTCATCTCCTAC         |
|                                           | IRKpro_R                | CTTTCCACAACCCTCTTCTCC           |
| IRK coding region                         | IRKcod_F                | CACCATGTACAAAGCACTGATTTTTACAGTC |
|                                           | IRKcod_R                | ACTTGAACCCAACTCATCTGAG          |
| KOIN promoter region                      | KOINpro_F               | AGTGAAGAGAAAGCAGAAGTGGA         |
|                                           | KOINpro_R               | CAGCTTGACTTCTTGACCCT            |
| KOIN coding region                        | KOINcod_F               | CACCATGATGCAGTTCCATTTCCAGTT     |
|                                           | KOINcod_R               | AACTTGGACGTTGGAGTCCTT           |
| <b>Primers to generate chimeras</b>       |                         |                                 |
| KOIN extracellular (LRR and TM)           | KOINLRR, TM_EcoR V_codR | TTACGATGATATCTTCCCTCTTGTC       |
| IRK cytoplasmic (kinase only)             | IRKK_EcoRV_codF         | GTTGGTGTAATAGATATCACGGTAC       |
| KOIN TM and cytoplasmic                   | KOINTM, K_BamHI_codF1   | CACAAAGAAGGATCCAAAAGGAA         |
| IRK extracellular (LRR only)              | IRKLRR_BamHI_codR1      | CTAAGCAGGATCCTTTGTGAC           |
| KOIN extracellular (LRR only)             | KOINLRR_BamHI_codR1     | TCCTTTTGGATCCTTCTTTGTGAG        |
| IRK TM and cytoplasmic                    | IRKTM, K_BamHI_codF1    | GGTCACAAAAGGATCCTTGCTT          |
| IRK extracellular (LRR and TM)            | IRKLRR, TM_EcoRV_codR1  | GACTGAAGATATCTCCGCCTGA          |
| KOIN cytoplasmic (kinase only)            | KOINK_EcoRV_codF1       | TGCTGCGATATCAAGAAAAAGGAC        |
| IRK extracellular (LRR only) - for ERECTA | IRKLRR_StuI_codR        | ATCCTTTTGAGGCCTGCAC             |
| ERECTA TM and cytoplasmic                 | ERTM, K_StuI_codF       | TAGTAGGCCTAACTCACCGT            |
| IRK extracellular (LRR and TM)-for ERECTA | IRKLRR, TM_BamHI_codR   | CTGATCTTGGATCCCGTTGAT           |
| ERECTA cytoplasmic (kinase only)          | ERK_BamHI_codF          | GATGGATCCCTTGACAAACCA           |
| ERECTA extracellular (LRR only)           | ERLRR, TM_SacII_codR    | GAGGAGGATTCCGCGGTC              |
| IRK TM cytoplasmic - for ERECTA           | IRKTM, K_speI_codF      | GGTCACAAAAGGATACTGACTAGT        |
| ERECTA extracellular (LRR and TM)         | ERLRR, TM_SacII_codR    | GAGGAGGATTCCGCGGTC              |
|                                           | IRKK_SacII_codF         | ACGGTACTTAATCCGCGGGT            |

|                                          |                     |                                 |
|------------------------------------------|---------------------|---------------------------------|
| IRK cytoplasmic (kinase only)-for ERECTA | ER_codF             | CACCATGGCTCTGTTTAGAGATATTGTTTC  |
|                                          | ER_codR             | CTCACTGTTCTGAGAAATAACTTGT       |
| <b>Primers to generate IRK deletions</b> |                     |                                 |
| $\Delta$ JxKD; $\Delta$ KD               | IRKcod_F            | CACCATGTACAAAGCACTGATTTTTACAGTC |
| $\Delta$ KD                              | IRKmut_trunc_R      | ATTTGTTCCAGTGCTGAAATC           |
| $\Delta$ JxKD                            | IRKtrunc2_R         | TACTGCTGATCTTGAAACCGT           |
| <b>Primers to generate KOIN deletion</b> |                     |                                 |
| $\Delta$ JxKD                            | KOINcod_F           | CACCATGATGCAGTCCATTTCCAGTT      |
| $\Delta$ JxKD                            | KOINcod_trunc-JxK_R | GCTGTCTTCCCTCTTGTCC             |
| <b>Primers to clone mSCARLETi</b>        |                     |                                 |
| mSCARLET                                 | mSCRLTi_p2p3_cod F  | ATGGTGTCCAAGGGCGAA              |
|                                          | mSCRLTi_p2p3_cod R  | TTACTTGTACAACCTCGTCCATACC       |
| <b>Primers used for KOIN qPCR</b>        |                     |                                 |
| KOIN.1                                   | KOIN V1_ex1/2_qF2   | CTCCAGGGTCAAGAAGTCA             |
|                                          | KOIN_ex2_qR2        | TGCCTATCCGAGTTCAGGTC            |
| KOIN.2 and KOIN.3                        | KOIN V2_ex1/2_qF2   | GTGTTAAAGGTCAAGAAGTCAAGC        |
|                                          | KOIN_ex2_qR2        | TGCCTATCCGAGTTCAGGTC            |
| PP2A                                     | PP2A_qF             | TAACGTGGCCAAAATGATGC            |
|                                          | PP2A_qR             | GTTCTCCACAACCGCTTGGT            |

276

## 277 Supplementary References

- 278 1. van Oostende-Triplet, C. *et al.* Vesicle dynamics during plant cell cytokinesis reveals  
279 distinct developmental phases. *Plant Physiol.* **174**, 1544–1558 (2017).
- 280 2. Richter, S. *et al.* Delivery of endocytosed proteins to the cell–division plane requires  
281 change of pathway from recycling to secretion. *Elife* **3**, e02131 (2014).
- 282 3. Kurepa, J., Karangwa, C., Duke, L. S. & Smalle, J. A. Arabidopsis sensitivity to protein  
283 synthesis inhibitors depends on 26S proteasome activity. *Plant Cell Rep.* **29**, 249–259  
284 (2010).
- 285 4. Jásik, J. & Schmelzer, E. Internalized and Newly Synthesized Arabidopsis PIN-FORMED2  
286 Pass through Brefeldin A Compartments: A New Insight into Intracellular Dynamics of the  
287 Protein by Using the Photoconvertible Fluorescence Protein Dendra2 as a Tag. *Mol. Plant*  
288 **7**, 1578–1581 (2014).
- 289 5. Li, R. *et al.* Different Endomembrane Trafficking Pathways Establish Apical and Basal  
290 Polarities. *Plant Cell* **29**, 90–108 (2017).
- 291 6. Zhang, C. *et al.* Endosidin2 targets conserved exocyst complex subunit EXO70 to inhibit  
292 exocytosis. *Proc. Natl. Acad. Sci.* **113**, E41 LP-E50 (2016).



- 293 7. Lešková, A. *et al.* Endosidin 2 accelerates PIN2 endocytosis and disturbs intracellular  
294 trafficking of PIN2, PIN3, and PIN4 but not of SYT1. *PLoS One* **15**, e0237448 (2020).
- 295 8. Wang, J., Cai, Y., Miao, Y., Lam, S. K. & Jiang, L. Wortmannin induces homotypic fusion of  
296 plant prevacuolar compartments\*. *J. Exp. Bot.* **60**, 3075–3083 (2009).
- 297 9. Faculty, P., Academy, P. P. & Biology, C. The secretory vesicles tethering complex exocyst  
298 and the auxin transport polarization Ph . D . Thesis Mgr . Edita Janková Drdová Prague  
299 2011 Supervisor : Consultant : 1–17
- 300 10. Renna, L. *et al.* TGNap1 is required for microtubule-dependent homeostasis of a  
301 subpopulation of the plant trans-Golgi network. *Nat. Commun.* **9**, 5313 (2018).
- 302 11. Geldner, Niko, Jiří Friml, York-Dieter Stierhof, Gerd Jürgens, and Klaus Palme. "Auxin  
303 transport inhibitors block PIN1 cycling and vesicle trafficking." *Nature* **413**, no. 6854: 425-  
304 428 (2001).
- 305
